# Supplementary material for: Long fusion correction of degenerative adult spinal deformity and the selection of the upper or lower thoracic region as the site of proximal instrumentation: a systematic review and meta-analysis
Source: PubMed Central journal article supplement (PMC5128941; doi:10.1136/bmjopen-2016-012103), 2016-11-15
Supplement: bmjopen-2016-012103supp_Figure.pdf [file bmjopen-2016-012103supp_Figure.pdf]

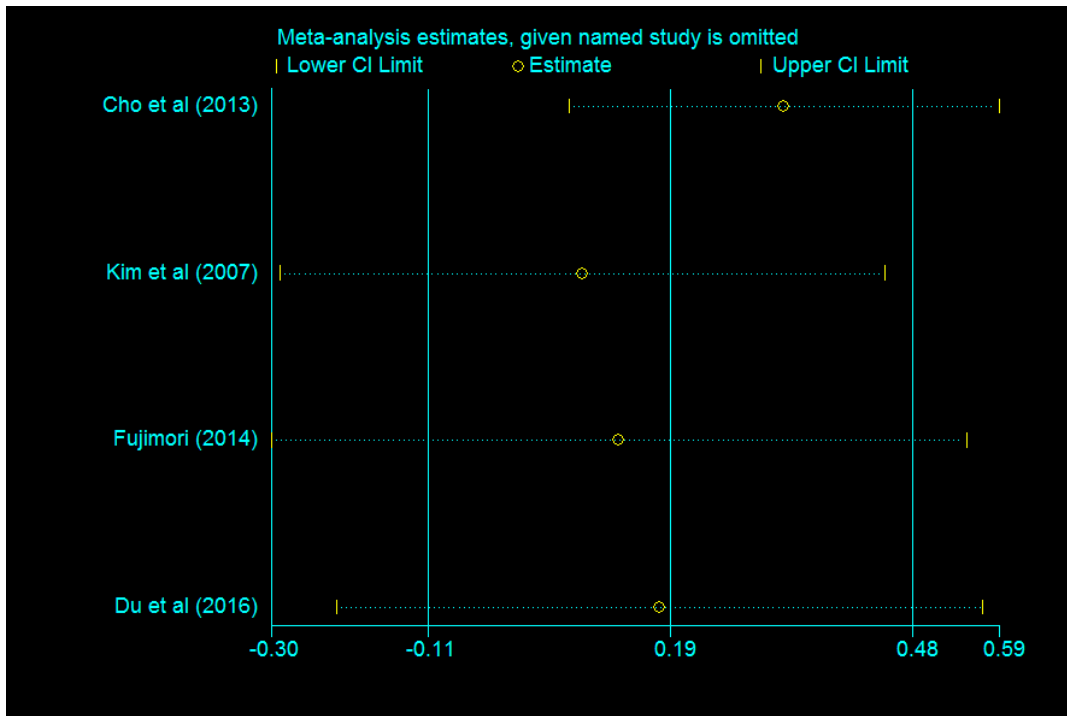

**Figure S1: A:** The sensitivity analysis of the lumbar lordosis.

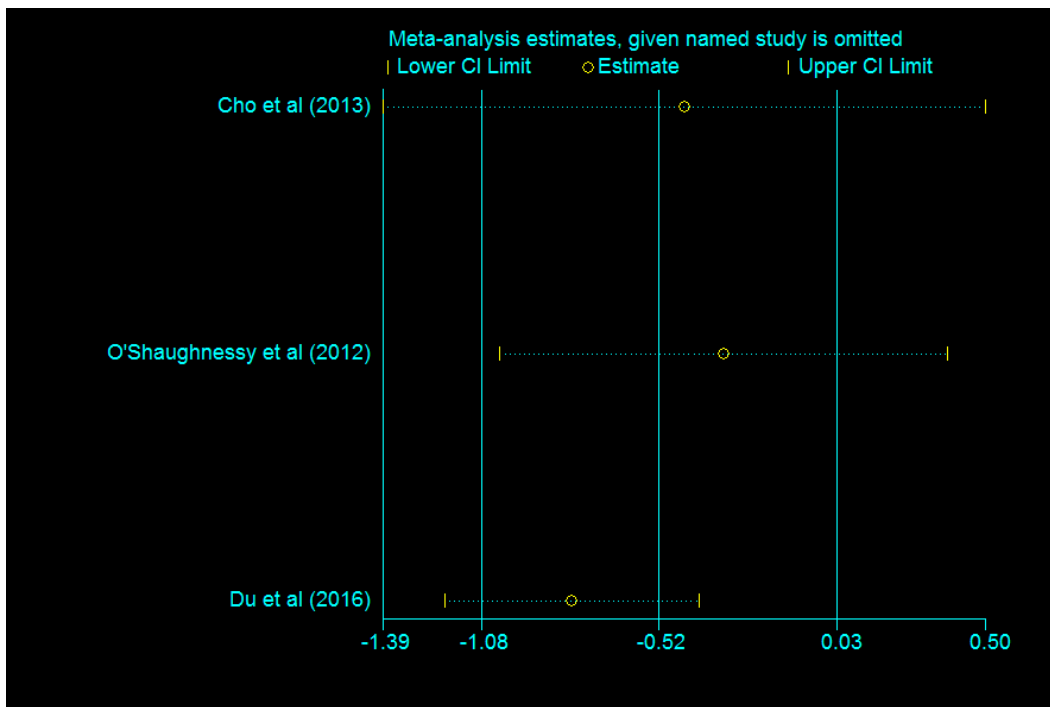

**Figure S1: B:** The sensitivity analysis of thoracolumbar kyphosis.

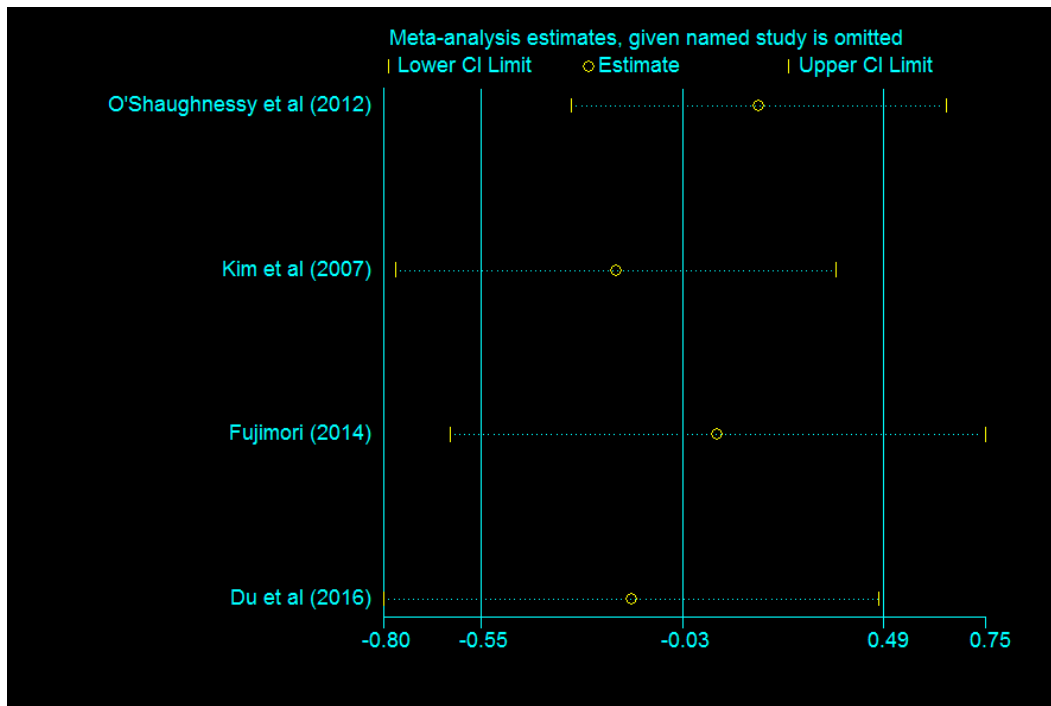

**Figure S1: C** The sensitivity analysis of the proximal junctional kyphotic angle.

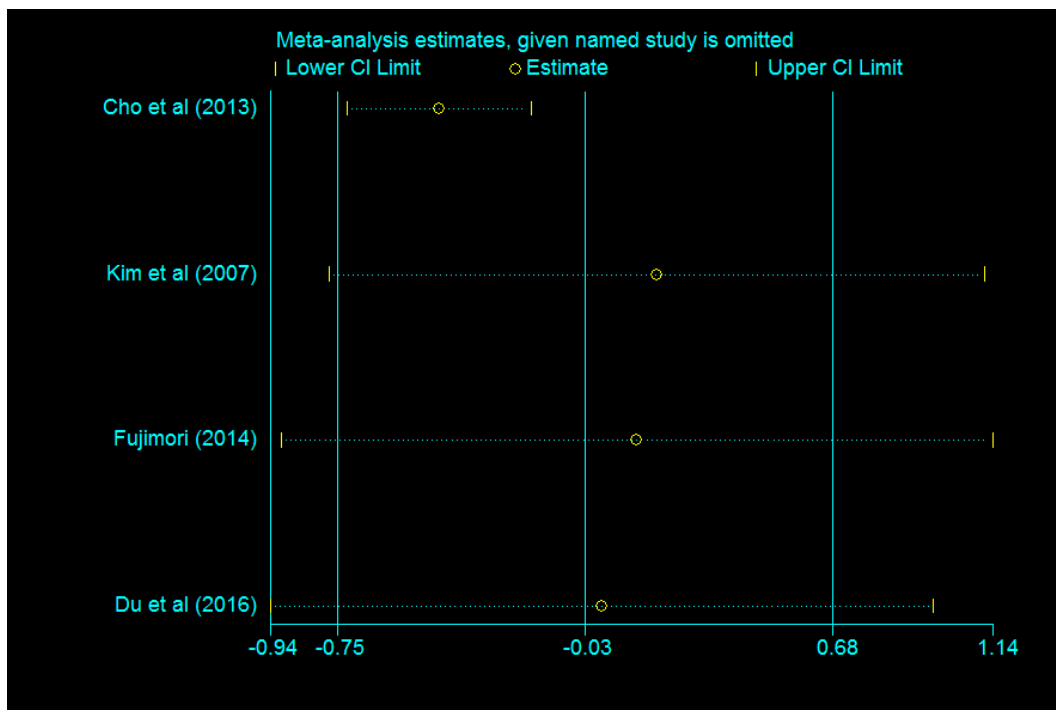

**Figure S1: D:** The sensitivity analysis of the C7 sagittal vertical axis. The estimated effect size was changed significantly after the study of Cho et al was omitted.

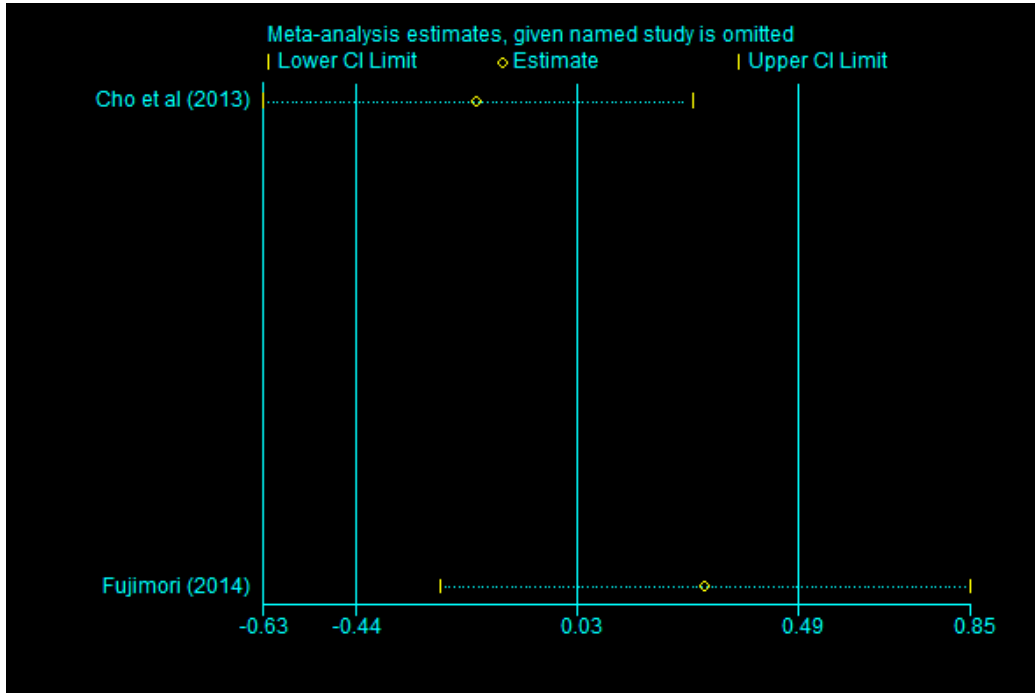

Figure S1: E: The sensitivity analysis of the pelvic incidence.

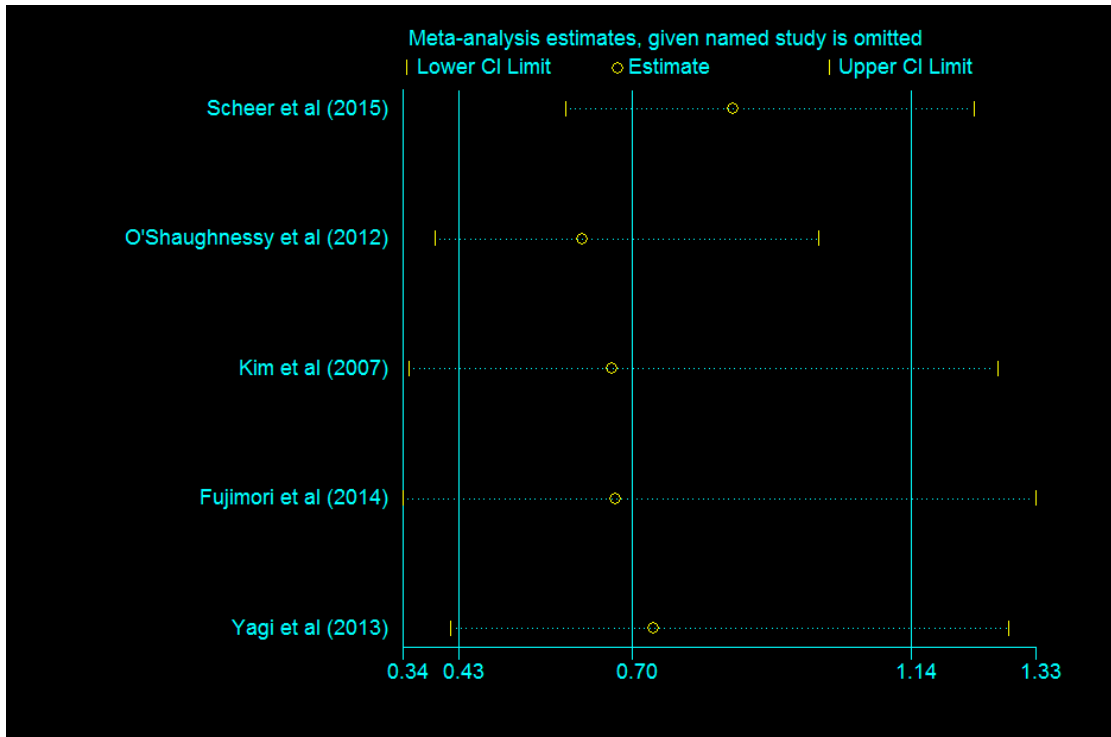

Figure S1: F: The sensitivity analysis of the total revision.

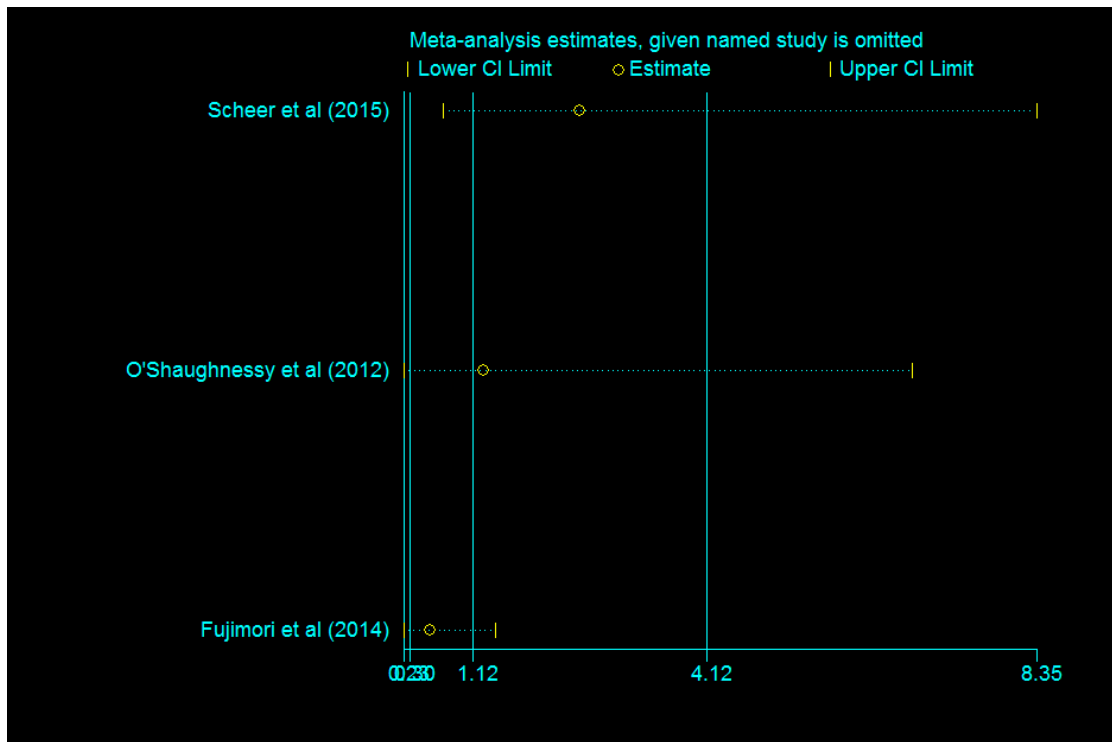

**Figure S1: G:** The sensitivity analysis of the hardware implant failure revision.
