# Supplementary material for: Long fusion correction of degenerative adult spinal deformity and the selection of the upper or lower thoracic region as the site of proximal instrumentation: a systematic review and meta-analysis
Source: PubMed Central journal article supplement (PMC5128941; doi:10.1136/bmjopen-2016-012103), 2016-11-15
Supplement: bmjopen-2016-012103supp_Table1.pdf [file bmjopen-2016-012103supp_Table1.pdf]

---

**Table S1:** The developed search strategy performed in database of Medline.

---

| No  | Search terms                         |
|-----|--------------------------------------|
| #1  | proximal fusion level                |
| #2  | upper instrumented vertebra          |
| #3  | proximal junctional kyphosis         |
| #4  | upper instrumented thoracic vertebra |
| #5  | #1 or #2 or #3 or #4                 |
| #6  | degenerative lumbar deformity        |
| #7  | adult lumbar deformity               |
| #8  | adult spinal deformity               |
| #9  | degenerative lumbar scoliosis        |
| #10 | adult scoliosis                      |
| #11 | #6 or #7 or #8 or #9 or #10          |
| #12 | #5 and #11                           |

---
