# Supplementary material for: Long fusion correction of degenerative adult spinal deformity and the selection of the upper or lower thoracic region as the site of proximal instrumentation: a systematic review and meta-analysis
Source: PubMed Central journal article supplement (PMC5128941; doi:10.1136/bmjopen-2016-012103), 2016-11-15
Supplement: bmjopen-2016-012103supp_Table2.pdf [file bmjopen-2016-012103supp_Table2.pdf]

**Table S2:** The results of publication bias analyzed by both Begg's and Egger's test.

| Parameters                                | <i>P</i> value by Begg's test | <i>P</i> value by Egger's test |
|-------------------------------------------|-------------------------------|--------------------------------|
| Operative time                            | 0.308                         | 0.474                          |
| Estimated blood loss                      | 1.000                         | 0.700                          |
| SRS pain                                  | 0.734                         | 0.502                          |
| SRS self-image                            | 0.308                         | 0.219                          |
| SRS function                              | 0.308                         | 0.888                          |
| SRS mental health                         | 0.296                         | 0.106                          |
| SRS subtotal score                        | 1.000                         | 0.595                          |
| SRS satisfaction                          | 1.000                         | 0.447                          |
| SRS total score                           | 0.296                         | 0.353                          |
| ODI                                       | 0.308                         | 0.296                          |
| Total complications                       | 1.000                         | 0.841                          |
| Total revision                            | 0.806                         | 0.705                          |
| Proximal junctional kyphosis for revision | 0.462                         | 0.919                          |
| Pseudorthosis for revision                | 0.734                         | 0.412                          |
| Hardware implant failure for revision     | 1.000                         | 0.877                          |

**Note:** all of the *P* value > 0.05, none of publication bias was observed.
